# Supplementary material for: An organic–inorganic hybrid double perovskite-type cage-like crystal (MA)2KBiCl6 (MA = methylammonium cation) with dielectric switching behavior
Source: Royal Society of Chemistry journal article supplement (doi:10.1039/d1ma00691f), 2021-01-01
Supplement: d1ma00691f1.pdf [file d1ma00691f1.pdf]

### Electronic Supplementary Information

#### An organic-inorganic hybrid double perovskite-type cage-like crystal (MA)<sub>2</sub>KBiCl<sub>6</sub> (MA = methylammonium Cation) with dielectric switch behavior†

Lin Xiang, Yi-Fang Huang, Yan Feng, Na Wang, Rong-Meng Liao, Le-Ping Miao,\* Jian-Rong Li,  
Heng-Yun Ye and Chao Shi\*

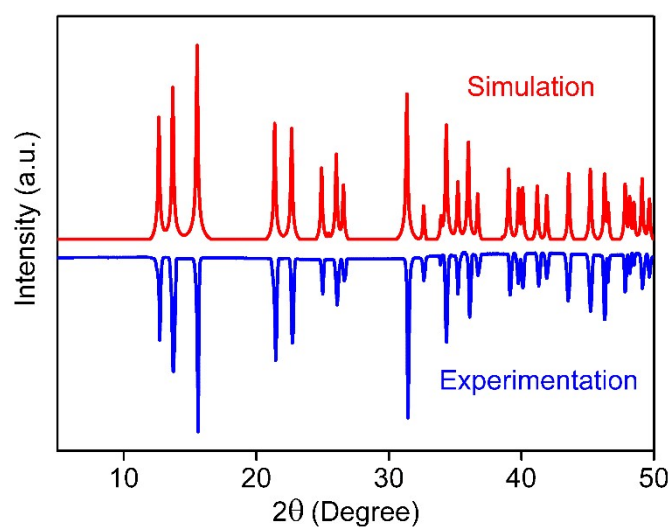

**Figure S1.** PXRD pattern **1** measured at room temperature.

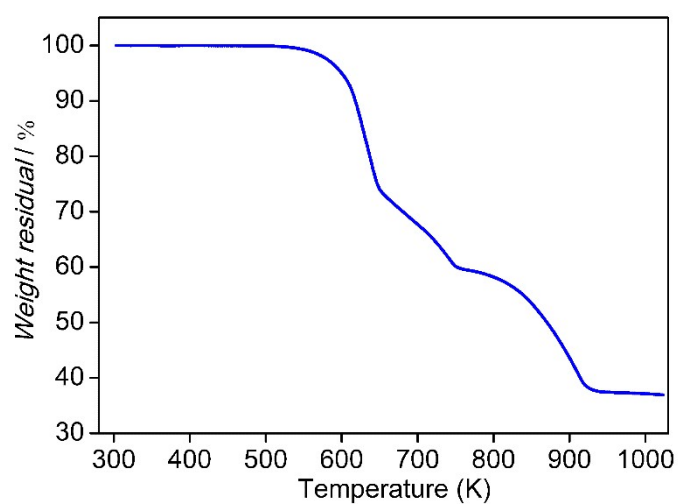

**Figure S2.** TGA curve of **1**.

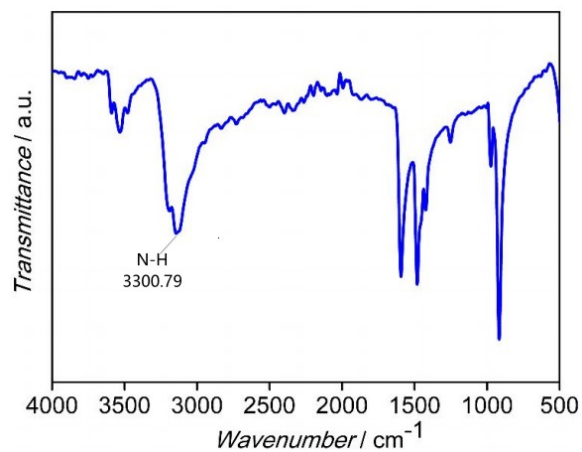

**Figure S3.** IR spectrum of **1** measured at room temperature.

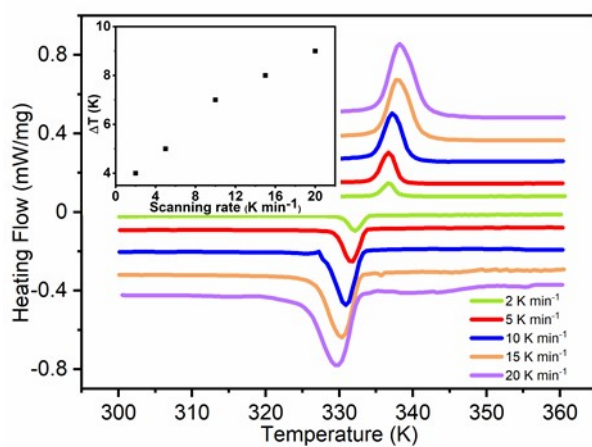

**Figure S4.** The scanning rate dependence of the DSC measurements on compound **1**.

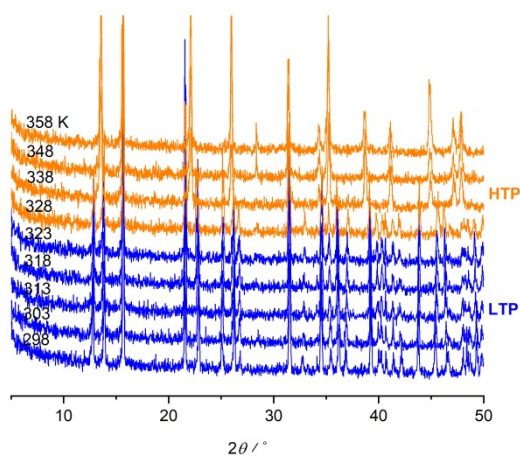

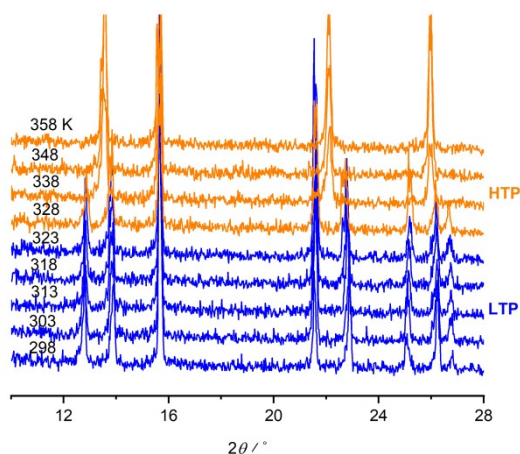

**Fig S5.** The variable-temperature powder XRD patterns of **1**.

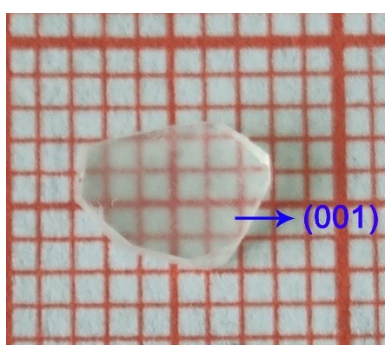

**Figure S6.** Crystal morphology of **1**.

**Table S1.** Selected bond lengths [Å] and angles [°] for **1** (293 K, 373 K).

| <b>1</b> (293 K)       |             |                                           |            |
|------------------------|-------------|-------------------------------------------|------------|
| Bi1–C11 <sup>i</sup>   | 2.6791 (13) | C11 <sup>i</sup> –Bi1–C11 <sup>ii</sup>   | 91.74 (6)  |
| Bi1–C11 <sup>ii</sup>  | 2.6791 (13) | C11 <sup>i</sup> –Bi1–C11 <sup>iii</sup>  | 91.74 (6)  |
| Bi1–C11 <sup>iii</sup> | 2.6791 (13) | C11 <sup>ii</sup> –Bi1–C11 <sup>iii</sup> | 91.74 (6)  |
| Bi1–C11 <sup>iv</sup>  | 2.6791 (13) | C11 <sup>i</sup> –Bi1–C11 <sup>iv</sup>   | 88.26 (6)  |
| Bi1–C11 <sup>v</sup>   | 2.6791 (13) | C11 <sup>ii</sup> –Bi1–C11 <sup>iv</sup>  | 180.0      |
| Bi1–C11                | 2.6792 (13) | C11 <sup>iii</sup> –Bi1–C11 <sup>iv</sup> | 88.26 (6)  |
| C11–K1                 | 3.0469 (13) | C11 <sup>i</sup> –Bi1–C11 <sup>v</sup>    | 88.26 (6)  |
| N1–C1                  | 1.287 (16)  | C11 <sup>ii</sup> –Bi1–C11 <sup>v</sup>   | 88.26 (6)  |
| N1–H1A                 | 0.8900      | C11 <sup>iii</sup> –Bi1–C11 <sup>v</sup>  | 180.0      |
| N1–H1B                 | 0.8900      | C11 <sup>iv</sup> –Bi1–C11 <sup>v</sup>   | 91.74 (6)  |
| N1–H1C                 | 0.8900      | C11 <sup>i</sup> –Bi1–C11                 | 180.0      |
| N1–H1A <sup>vi</sup>   | 0.89 (5)    | C11 <sup>ii</sup> –Bi1–C11                | 88.26 (6)  |
| N1–H1A <sup>vii</sup>  | 0.89 (18)   | C11 <sup>iii</sup> –Bi1–C11               | 88.26 (6)  |
| N1–H1A <sup>viii</sup> | 0.89 (13)   | C11 <sup>iv</sup> –Bi1–C11                | 91.74 (6)  |
| C1–H1D                 | 0.9600      | C11 <sup>v</sup> –Bi1–C11                 | 91.74 (6)  |
| C1–H1E                 | 0.9600      | Bi1–C11–K1                                | 173.07 (8) |

---

|                        |           |                                            |            |
|------------------------|-----------|--------------------------------------------|------------|
| C1-H1F                 | 0.9600    | C11 <sup>ix</sup> -K1-C11 <sup>x</sup>     | 81.69 (5)  |
| C1-H1D <sup>vi</sup>   | 0.96 (12) | C11 <sup>ix</sup> -K1-C11 <sup>xi</sup>    | 180.0      |
| C1-H1D <sup>vii</sup>  | 0.96 (3)  | C11 <sup>x</sup> -K1-C11 <sup>xi</sup>     | 98.31 (5)  |
| C1-H1D <sup>viii</sup> | 0.96 (16) | C11 <sup>ix</sup> -K1-C11 <sup>xii</sup>   | 98.31 (5)  |
| Bi1-K1                 | 5.716     | C11 <sup>x</sup> -K1-C11 <sup>xii</sup>    | 180.0      |
|                        |           | C11 <sup>xi</sup> -K1-C11 <sup>xii</sup>   | 81.69 (5)  |
|                        |           | C11 <sup>ix</sup> -K1-C11                  | 98.31 (5)  |
|                        |           | C11 <sup>x</sup> -K1-C11                   | 98.31 (5)  |
|                        |           | C11 <sup>xi</sup> -K1-C11                  | 81.69 (5)  |
|                        |           | C11 <sup>xii</sup> -K1-C11                 | 81.69 (5)  |
|                        |           | C11 <sup>ix</sup> -K1-C11 <sup>xiii</sup>  | 81.69 (5)  |
|                        |           | C11 <sup>x</sup> -K1-C11 <sup>xiii</sup>   | 81.69 (5)  |
|                        |           | C11 <sup>xi</sup> -K1-C11 <sup>xiii</sup>  | 98.31 (5)  |
|                        |           | C11 <sup>xii</sup> -K1-C11 <sup>xiii</sup> | 98.31 (5)  |
|                        |           | C11-K1-C11 <sup>xiii</sup>                 | 180.0      |
|                        |           | C1-N1-H1A                                  | 109.5      |
|                        |           | C1-N1-H1B                                  | 109.5      |
|                        |           | H1A-N1-H1B                                 | 109.5      |
|                        |           | C1-N1-H1C                                  | 109.5      |
|                        |           | H1A-N1-H1C                                 | 109.5      |
|                        |           | H1B-N1-H1C                                 | 109.5      |
|                        |           | C1-N1-H1A <sup>vi</sup>                    | 109.5 (12) |
|                        |           | H1A-N1-H1A <sup>vi</sup>                   | 138.1      |
|                        |           | H1B-N1-H1A <sup>vi</sup>                   | 70.8       |
|                        |           | H1C-N1-H1A <sup>vi</sup>                   | 41.6       |
|                        |           | C1-N1-H1A <sup>vii</sup>                   | 109 (4)    |
|                        |           | H1A-N1-H1A <sup>vii</sup>                  | 70.8       |
|                        |           | H1B-N1-H1A <sup>vii</sup>                  | 41.6       |
|                        |           | H1C-N1-H1A <sup>vii</sup>                  | 138.1      |
|                        |           | H1A <sup>vi</sup> -N1-H1A <sup>vii</sup>   | 109.5      |
|                        |           | C1-N1-H1A <sup>viii</sup>                  | 109 (3)    |
|                        |           | H1A-N1-H1A <sup>viii</sup>                 | 41.6       |
|                        |           | H1B-N1-H1A <sup>viii</sup>                 | 138.1      |
|                        |           | H1C-N1-H1A <sup>viii</sup>                 | 70.8       |
|                        |           | H1A <sup>vi</sup> -N1-H1A <sup>viii</sup>  | 109.5      |
|                        |           | H1A <sup>vii</sup> -N1-H1A <sup>viii</sup> | 109.5      |
|                        |           | N1-C1-H1D                                  | 109.5      |
|                        |           | N1-C1-H1E                                  | 109.5      |
|                        |           | H1D-C1-H1E                                 | 109.5      |
|                        |           | N1-C1-H1F                                  | 109.5      |
|                        |           | H1D-C1-H1F                                 | 109.5      |
|                        |           | H1E-C1-H1F                                 | 109.5      |
|                        |           | N1-C1-H1D <sup>vi</sup>                    | 109 (3)    |
|                        |           | H1D-C1-H1D <sup>vi</sup>                   | 46.6       |

---

---

|                                            |           |
|--------------------------------------------|-----------|
| H1E–C1–H1D <sup>vi</sup>                   | 65.8      |
| H1F–C1–H1D <sup>vi</sup>                   | 139.7     |
| N1–C1–H1D <sup>vii</sup>                   | 109.5 (6) |
| H1D–C1–H1D <sup>vii</sup>                  | 139.7     |
| H1E–C1–H1D <sup>vii</sup>                  | 46.6      |
| H1F–C1–H1D <sup>vii</sup>                  | 65.8      |
| H1D <sup>vi</sup> –C1–H1D <sup>vii</sup>   | 109.5     |
| N1–C1–H1D <sup>viii</sup>                  | 109 (3)   |
| H1D–C1–H1D <sup>viii</sup>                 | 65.8      |
| H1E–C1–H1D <sup>viii</sup>                 | 139.7     |
| H1F–C1–H1D <sup>viii</sup>                 | 46.6      |
| H1D <sup>vi</sup> –C1–H1D <sup>viii</sup>  | 109.5     |
| H1D <sup>vii</sup> –C1–H1D <sup>viii</sup> | 109.5     |

Symmetry codes: (i)  $-x+4/3, -y+2/3, -z+2/3$ ; (ii)  $y+1/3, -x+y+2/3, -z+2/3$ ; (iii)  $x-y+1/3, x-1/3, -z+2/3$ ; (iv)  $-y+1, x-y, z$ ; (v)  $-x+y+1, -x+1, z$ ; (vi)  $-y+1, -x+1, z$ ; (vii)  $-x+y, y, z$ ; (viii)  $x, x-y+1, z$ ; (ix)  $y-1/3, -x+y+1/3, -z+1/3$ ; (x)  $x-y+2/3, x+1/3, -z+1/3$ ; (xi)  $-y+1, x-y+1, z$ ; (xii)  $-x+y, -x+1, z$ ; (xiii)  $-x+2/3, -y+4/3, -z+1/3$ .

**1 (373 K)**

|                        |           |                                            |       |
|------------------------|-----------|--------------------------------------------|-------|
| Bi1–C11 <sup>i</sup>   | 2.686 (2) | C11 <sup>i</sup> –Bi1–C11                  | 90.0  |
| Bi1–C11                | 2.686 (2) | C11 <sup>i</sup> –Bi1–C11 <sup>ii</sup>    | 90.0  |
| Bi1–C11 <sup>ii</sup>  | 2.686 (2) | C11–Bi1–C11 <sup>ii</sup>                  | 90.0  |
| Bi1–C11 <sup>iii</sup> | 2.686 (2) | C11 <sup>i</sup> –Bi1–C11 <sup>iii</sup>   | 90.0  |
| Bi1–C11 <sup>iv</sup>  | 2.686 (2) | C11–Bi1–C11 <sup>iii</sup>                 | 180.0 |
| Bi1–C11 <sup>v</sup>   | 2.686 (2) | C11 <sup>ii</sup> –Bi1–C11 <sup>iii</sup>  | 90.0  |
| C11–K1                 | 3.040 (2) | C11 <sup>i</sup> –Bi1–C11 <sup>iv</sup>    | 180.0 |
| N1–C1                  | 1.35 (3)  | C11–Bi1–C11 <sup>iv</sup>                  | 90.0  |
| Bi1–K1                 | 5.726     | C11 <sup>ii</sup> –Bi1–C11 <sup>iv</sup>   | 90.0  |
|                        |           | C11 <sup>iii</sup> –Bi1–C11 <sup>iv</sup>  | 90.0  |
|                        |           | C11 <sup>i</sup> –Bi1–C11 <sup>v</sup>     | 90.0  |
|                        |           | C11–Bi1–C11 <sup>v</sup>                   | 90.0  |
|                        |           | C11 <sup>ii</sup> –Bi1–C11 <sup>v</sup>    | 180.0 |
|                        |           | C11 <sup>iii</sup> –Bi1–C11 <sup>v</sup>   | 90.0  |
|                        |           | C11 <sup>iv</sup> –Bi1–C11 <sup>v</sup>    | 90.0  |
|                        |           | Bi1–C11–K1                                 | 180.0 |
|                        |           | C11 <sup>vi</sup> –K1–C11 <sup>vii</sup>   | 180.0 |
|                        |           | C11 <sup>vi</sup> –K1–C11 <sup>viii</sup>  | 90.0  |
|                        |           | C11 <sup>vii</sup> –K1–C11 <sup>viii</sup> | 90.0  |
|                        |           | C11 <sup>vi</sup> –K1–C11 <sup>ix</sup>    | 90.0  |
|                        |           | C11 <sup>vii</sup> –K1–C11 <sup>ix</sup>   | 90.0  |
|                        |           | C11 <sup>viii</sup> –K1–C11 <sup>ix</sup>  | 90.0  |
|                        |           | C11 <sup>vi</sup> –K1–C11 <sup>x</sup>     | 90.0  |
|                        |           | C11 <sup>vii</sup> –K1–C11 <sup>x</sup>    | 90.0  |
|                        |           | C11 <sup>viii</sup> –K1–C11 <sup>x</sup>   | 90.0  |

---

|                                        |       |
|----------------------------------------|-------|
| C11 <sup>ix</sup> -K1-C11 <sup>x</sup> | 180.0 |
| C11 <sup>vi</sup> -K1-C11              | 90.0  |
| C11 <sup>vii</sup> -K1-C11             | 90.0  |
| C11 <sup>viii</sup> -K1-C11            | 180.0 |
| C11 <sup>ix</sup> -K1-C11              | 90.0  |
| C11 <sup>x</sup> -K1-C11               | 90.0  |

Symmetry codes: (i)  $-z+1/2, -x+1/2, -y+1$ ; (ii)  $-y+1/2, -z+1, -x+1/2$ ; (iii)  $-x, -y+1, -z+1$ ; (iv)  $z-1/2, x+1/2, y$ ; (v)  $y-1/2, z, x+1/2$ ; (vi)  $-y+1, -z+1, -x+1$ ; (vii)  $y, z, x$ ; (viii)  $-x+1, -y+1, -z+1$ ; (ix)  $z, x, y$ ; (x)  $-z+1, -x+1, -y+1$ .

**Table S2.** Hydrogen bonds (Å, °) for **1** (293 K).

|                             | D-H  | H···A | D···A    | D-H···A |
|-----------------------------|------|-------|----------|---------|
| D-H···A                     |      |       |          |         |
| N1-H1A···C11 <sup>xi</sup>  | 0.89 | 2.83  | 3.429(7) | 126     |
| N1-H1B···C11 <sup>xii</sup> | 0.89 | 2.83  | 3.429(7) | 126     |
| N1-H1C···C11                | 0.89 | 2.83  | 3.429(7) | 126     |

Symmetry codes: (xi)  $-y+1, x-y+1, z$ ; (xii)  $-x+y, -x+1, z$ .
